# Supplementary material
Source: MDPI journal article supplement (https://www.mdpi.com/1424-8247/16/4/608)
Supplement: s1 [file s1]

Supplementary Material to the manuscript entitled

*Article*

# Design of Potent Inhibitors Targeting the Main Protease of SARS-CoV-2 Using QSAR Modeling, Molecular Docking, and Molecular Dynamics Simulations

Mehdi Oubahmane <sup>1</sup>, Ismail Hdoufane <sup>1</sup>, Christelle Delaite <sup>2</sup>, Adlane Sayede <sup>3</sup>, Driss Cherqaoui <sup>1</sup> and Achraf El Allali <sup>4,\*</sup>

<sup>1</sup> Laboratory of Molecular Chemistry, Department of Chemistry, Faculty of Sciences Semlalia, BP 2390, Marrakech 40000, Morocco; mehdi.oubahmane@ced.uca.ma (M.O.); ismail.hdoufane@edu.uca.ma (I.H.); cherqaoui@uca.ma (D.C.)

<sup>2</sup> Laboratoire de Photochimie et d'Ingénierie Macromoléculaires (LPIM), Ecole Nationale Supérieure de Chimie de Mulhouse, Université de Haute-Alsace, 68100 Mulhouse, France; christelle.delaite@uha.fr

<sup>3</sup> University Artois, CNRS, Centrale Lille, University Lille, UMR 8181, Unité de Catalyse et Chimie du Solide (UCCS), F-62300 Lens, France; adlane.sayede@univ-artois.fr

<sup>4</sup> African Genome Center, Mohammed VI Polytechnic University, Ben Guerir 43150, Morocco

\* Correspondence: achraf.elallali@um6p.ma

**Figure S1:** Superimposed view of native pose of co-crystallized ligand (black) with its x-ray pose (red) inside the CS of Mpro.

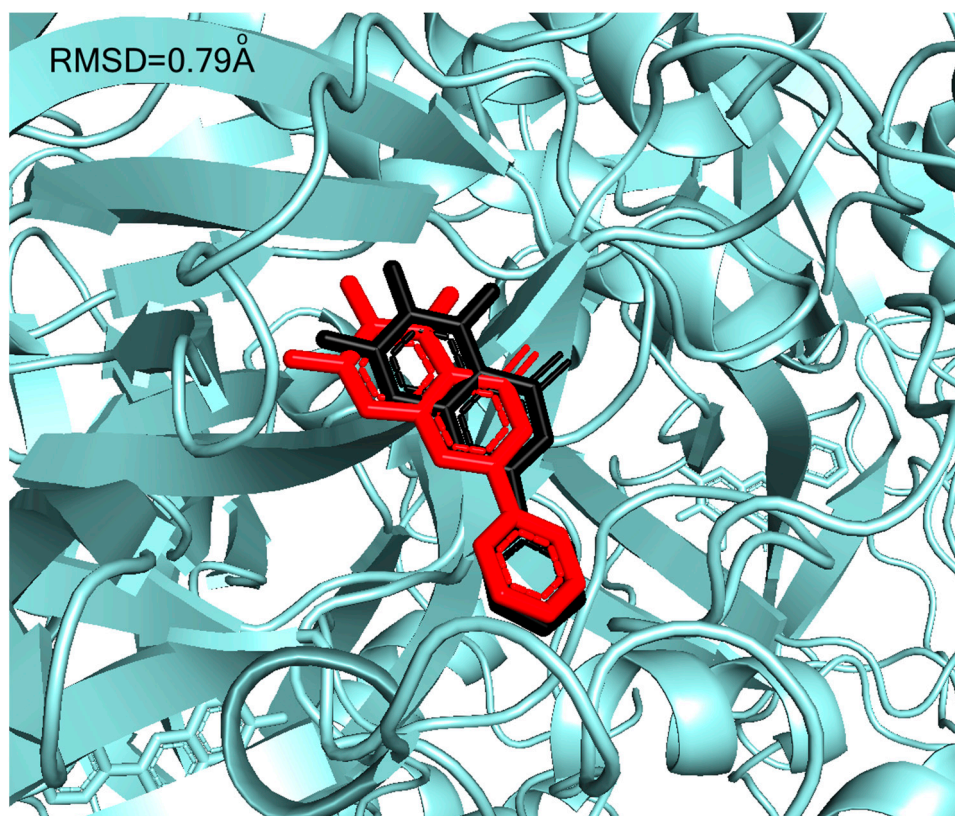

**Table S1:** Split distribution, experimental pIC<sub>50</sub> and calculated pIC<sub>50</sub> for the three splits using TF2 (with W<sub>HC</sub>=0.2).

| ID | Exp.<br>pIC <sub>50</sub> | Split <sup>a</sup> |   |   | Calculated pIC <sub>50</sub> |         |         | Applicability domain |         |         |
|----|---------------------------|--------------------|---|---|------------------------------|---------|---------|----------------------|---------|---------|
|    |                           | 1                  | 2 | 3 | Split 1                      | Split 2 | Split 3 | Split 1              | Split 2 | Split 3 |
| 1  | 4.214                     | +                  | – | – | 4.1428                       | 4.1300  | 4.1929  | Yes                  | Yes     | Yes     |
| 2  | 4.481                     | +                  | – | * | 4.2131                       | 4.3113  | 4.2630  | Yes                  | Yes     | Yes     |
| 3  | 4.531                     | –                  | * | * | 4.6411                       | 4.3567  | 4.6561  | Yes                  | Yes     | Yes     |
| 4  | 5.043                     | –                  | # | – | 4.5873                       | 4.6349  | 4.8800  | Yes                  | Yes     | Yes     |
| 5  | 5.190                     | –                  | + | * | 5.1855                       | 5.1814  | 5.1846  | Yes                  | Yes     | Yes     |
| 6  | 4.714                     | +                  | + | + | 4.9933                       | 4.7377  | 5.0510  | Yes                  | Yes     | Yes     |
| 7  | 4.945                     | #                  | + | # | 4.7985                       | 4.9938  | 4.8746  | Yes                  | Yes     | Yes     |
| 8  | 4.000                     | –                  | – | – | 4.1463                       | 4.0711  | 4.2708  | Yes                  | Yes     | Yes     |
| 9  | 4.000                     | *                  | – | + | 4.1666                       | 4.0625  | 4.2863  | Yes                  | Yes     | Yes     |
| 10 | 4.000                     | –                  | # | + | 4.0680                       | 4.0934  | 4.2136  | Yes                  | Yes     | Yes     |
| 11 | 4.068                     | #                  | + | # | 4.0680                       | 4.0934  | 4.2136  | Yes                  | Yes     | Yes     |
| 12 | 4.000                     | +                  | + | + | 4.1903                       | 4.2836  | 4.3152  | Yes                  | Yes     | Yes     |
| 13 | 4.239                     | *                  | + | + | 4.2022                       | 4.0959  | 4.2421  | Yes                  | Yes     | Yes     |
| 14 | 4.269                     | +                  | * | – | 4.2825                       | 4.1926  | 4.3054  | Yes                  | Yes     | Yes     |
| 15 | 4.230                     | –                  | + | + | 4.1458                       | 4.1612  | 4.1659  | Yes                  | Yes     | Yes     |
| 16 | 4.166                     | –                  | * | – | 4.2022                       | 4.0959  | 4.2421  | Yes                  | Yes     | Yes     |
| 17 | 5.248                     | –                  | – | – | 4.6983                       | 4.7519  | 4.7947  | Yes                  | Yes     | Yes     |
| 18 | 4.175                     | +                  | + | * | 4.1502                       | 4.0096  | 4.2101  | Yes                  | Yes     | Yes     |
| 19 | 4.446                     | *                  | * | – | 4.1502                       | 4.0996  | 4.2101  | Yes                  | Yes     | Yes     |
| 20 | 4.733                     | +                  | – | + | 4.2724                       | 4.2897  | 4.3117  | Yes                  | Yes     | Yes     |
| 21 | 4.849                     | +                  | – | – | 4.6208                       | 4.7470  | 4.7209  | Yes                  | Yes     | Yes     |
| 22 | 4.922                     | –                  | – | + | 4.7155                       | 4.8018  | 4.7180  | Yes                  | Yes     | Yes     |
| 23 | 4.859                     | +                  | # | – | 4.7288                       | 4.7642  | 4.7430  | Yes                  | Yes     | Yes     |
| 24 | 4.000                     | +                  | – | – | 4.0597                       | 3.9386  | 4.0623  | Yes                  | Yes     | Yes     |
| 25 | 4.000                     | +                  | – | – | 4.0477                       | 3.9175  | 4.0262  | Yes                  | Yes     | Yes     |
| 26 | 4.000                     | –                  | # | # | 3.9729                       | 3.9334  | 4.0129  | Yes                  | Yes     | Yes     |
| 27 | 4.000                     | +                  | + | * | 4.3913                       | 4.0742  | 4.2889  | Yes                  | Yes     | Yes     |
| 28 | 4.000                     | +                  | – | + | 4.3244                       | 3.9341  | 4.1780  | Yes                  | Yes     | Yes     |
| 29 | 5.069                     | #                  | + | # | 5.1427                       | 5.2487  | 5.0898  | Yes                  | Yes     | Yes     |
| 30 | 5.609                     | –                  | # | – | 5.7410                       | 5.7953  | 5.7864  | Yes                  | Yes     | Yes     |
| 31 | 5.008                     | –                  | * | – | 5.2449                       | 5.1393  | 5.2338  | Yes                  | Yes     | Yes     |
| 32 | 5.320                     | –                  | + | + | 5.1557                       | 5.1861  | 5.1766  | Yes                  | Yes     | Yes     |
| 33 | 4.989                     | +                  | # | + | 5.2160                       | 5.2912  | 5.2186  | Yes                  | Yes     | Yes     |
| 34 | 5.479                     | +                  | – | + | 5.2432                       | 5.1299  | 5.2476  | Yes                  | Yes     | Yes     |
| 35 | 5.000                     | #                  | + | – | 5.2746                       | 5.1878  | 5.3179  | Yes                  | Yes     | Yes     |
| 36 | 4.950                     | +                  | # | – | 5.0011                       | 5.1196  | 5.0366  | Yes                  | Yes     | Yes     |
| 37 | 5.131                     | *                  | + | # | 5.1074                       | 5.0168  | 5.0161  | Yes                  | Yes     | Yes     |
| 38 | 5.280                     | +                  | – | * | 5.2712                       | 5.1206  | 5.2590  | Yes                  | Yes     | Yes     |
| 39 | 5.368                     | #                  | * | + | 5.1820                       | 5.1674  | 5.2018  | Yes                  | Yes     | Yes     |
| 40 | 5.565                     | –                  | – | + | 5.1820                       | 5.1674  | 5.2018  | Yes                  | Yes     | Yes     |
| 41 | 5.172                     | –                  | – | – | 5.1926                       | 5.1977  | 5.2477  | Yes                  | Yes     | Yes     |
| 42 | 5.556                     | +                  | + | * | 5.2423                       | 5.2725  | 5.2438  | Yes                  | Yes     | Yes     |
| 43 | 5.051                     | #                  | + | – | 5.2695                       | 5.2012  | 5.2728  | Yes                  | Yes     | Yes     |
| 44 | 5.177                     | *                  | * | – | 5.2014                       | 5.0097  | 5.3382  | Yes                  | Yes     | Yes     |
| 45 | 5.234                     | +                  | – | + | 5.3909                       | 5.2401  | 5.4139  | Yes                  | Yes     | Yes     |
| 46 | 5.437                     | #                  | * | # | 5.3009                       | 5.1691  | 5.3431  | Yes                  | Yes     | Yes     |

|    |       |   |   |   |        |        |        |     |     |     |
|----|-------|---|---|---|--------|--------|--------|-----|-----|-----|
| 47 | 5.082 | – | – | + | 5.7673 | 5.7766 | 5.8117 | Yes | Yes | Yes |
| 48 | 5.480 | # | – | – | 5.6942 | 5.6731 | 5.7102 | Yes | Yes | Yes |
| 49 | 5.810 | – | + | + | 5.6913 | 5.7831 | 5.6733 | Yes | Yes | Yes |
| 50 | 5.742 | – | – | + | 5.1300 | 5.4103 | 5.1793 | Yes | Yes | Yes |
| 51 | 4.990 | * | + | # | 5.0950 | 4.8285 | 4.9463 | Yes | Yes | Yes |
| 52 | 5.268 | – | + | + | 5.1321 | 5.1449 | 5.0887 | Yes | Yes | Yes |
| 53 | 5.327 | * | # | – | 5.1321 | 5.1449 | 5.0887 | Yes | Yes | Yes |
| 54 | 4.971 | – | + | * | 5.1925 | 5.2499 | 5.1307 | Yes | Yes | Yes |
| 55 | 5.260 | * | + | # | 5.2511 | 5.1466 | 5.2300 | Yes | Yes | Yes |

---

<sup>a</sup> the signs represent the type of set to which each compound belongs in each split. +, –, #, and \* represent AT, PT, Cal, and Val sets respectively.

**Table S2:** Chemical structures of designed Mpro inhibitors

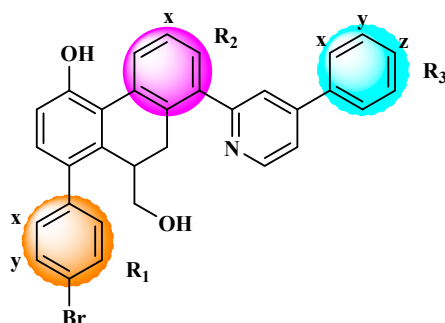

| ID  | Promoter of increase |   | Feature          | pIC <sub>50</sub> (CORAL) | pIC <sub>50</sub> (GA-MLR) | Binding affinity in CS (Kcal/mol) |
|-----|----------------------|---|------------------|---------------------------|----------------------------|-----------------------------------|
| 49  | <b>R1</b>            | x | C...C...(...     | <b>5.78*</b>              | <b>5.65*</b>               | <b>-11.47</b>                     |
| 49a |                      |   | c...c...(...     | 5.92                      | 5.73                       | -11.77                            |
| 49b |                      |   | c...c...c...c... | 5.95                      | 5.74                       | -11.77                            |
| 49c |                      |   | C.....           | 6.44                      | 6.18                       | <b>-10.62</b>                     |
| 49d |                      | y | -cyclopentdiene  | 6.14                      | 5.80                       | -11.65                            |
|     |                      |   | C...C...C...C... |                           |                            |                                   |
| 49e |                      |   | C...C...(...     | 5.93                      | 5.74                       | -11.96                            |
| 49f |                      |   | c...c...(...     | 5.86                      | 5.70                       | -12.02                            |
| 49g |                      | z | c...c...c...c... | 6.44                      | 5.99                       | -11.88                            |
| 49h |                      |   | C.....           | 6.29                      | 5.67                       | -12.53                            |
|     |                      |   | C...C...C...C... |                           |                            |                                   |
| 49i | <b>R2</b>            | x | C...C...(...     | 5.91                      | 5.79                       | -12.06                            |
| 49j |                      |   | c...c...(...     | 5.85                      | 5.71                       | -12.21                            |
| 49k |                      |   | c...c...c...c... | 6.42                      | 5.97                       | <b>-9.56</b>                      |
| 49l |                      |   | C.....           | 6.28                      | 5.67                       | -11.92                            |
|     |                      | y | -cyclopentdiene  |                           |                            |                                   |
|     |                      |   | C...C...C...C... |                           |                            |                                   |
| 49m |                      |   | C...C...(...     | 5.91                      | 5.89                       | -12.46                            |
| 49n |                      |   | c...c...(...     | <b>5.85</b>               | <b>5.80</b>                | <b>-12.63</b>                     |
| 49o | <b>R3</b>            | x | c...c...c...c... | 6.42                      | 6.21                       | -11.89                            |
| 49p |                      |   | C.....           | <b>6.28</b>               | <b>6.18</b>                | <b>-12.98</b>                     |
|     |                      |   | C...C...C...C... |                           |                            |                                   |
| 49q |                      |   | C...C...(...     | 5.88                      | 5.66                       | -12.18                            |
| 49r |                      | y | c...c...(...     | 5.82                      | 5.69                       | -12.24                            |
| 49s |                      |   | c...c...c...c... | 6.39                      | 6.01                       | -11.67                            |
| 49t |                      |   | C.....           | 6.22                      | 5.70                       | -12.30                            |
|     |                      |   | C...C...C...C... |                           |                            |                                   |
| 49u |                      | z | C...C...(...     | 5.92                      | 5.79                       | -12.44                            |
| 49v |                      |   | c...c...(...     | 5.89                      | <b>5.59</b>                | -12.52                            |
| 49w |                      |   | c...c...c...c... | 6.44                      | 5.99                       | -12.02                            |
| 49x |                      |   | C.....           | <b>6.12</b>               | <b>5.69</b>                | <b>-12.85</b>                     |
|     |                      |   | -cyclopentdiene  |                           |                            |                                   |
|     |                      |   | C...C...C...C... |                           |                            |                                   |

**Table S3:** Details of ligand–protein interactions of designed compounds within the CS of Mpro.

| Compound   | Binding affinity<br>(Kcal/mol) | Category              | Type            | Residue | Distance<br>(Å) |
|------------|--------------------------------|-----------------------|-----------------|---------|-----------------|
| <b>49</b>  | –11.47                         | Hydrogen Bond<br>(HB) | Conventional HB | CYS44   | 2.40            |
|            |                                |                       |                 | TYR54   | 2.36            |
|            |                                |                       |                 | HIS164  | 1.90            |
|            |                                | Hydrophobic           | Carbon HB       | THR26   | 3.62            |
|            |                                |                       | Pi–donor HB     | CYS145  | 3.60            |
|            |                                |                       | Pi–sigma        | ASN142  | 3.82            |
|            |                                |                       | Pi–Pi–stacked   | HIS41   | 4.12            |
|            |                                |                       |                 | HIS41   | 5.18            |
|            |                                |                       | Alkyl           | LEU167  | 5.29            |
|            |                                |                       |                 | PRO168  | 5.13            |
|            |                                |                       | Pi–alkyl        | MET49   | 4.68            |
|            |                                |                       |                 | MET49   | 5.15            |
|            |                                | Other                 | Pi–sulfur       | CYS44   | 5.30            |
|            |                                |                       |                 | CYS145  | 4.22            |
|            |                                |                       |                 | CYS44   | 5.29            |
|            |                                |                       |                 | MET165  | 4.44            |
| <b>49n</b> | –12.63                         | Hydrogen Bond<br>(HB) | Conventional HB | CYS44   | 2.39            |
|            |                                |                       |                 | TYR54   | 2.79            |
|            |                                |                       |                 | HIS164  | 1.92            |
|            |                                | Hydrophobic           | Carbon HB       | THR26   | 3.62            |
|            |                                |                       | Pi–donor HB     | CYS145  | 3.86            |
|            |                                |                       |                 | CYS145  | 3.99            |
|            |                                |                       | Pi–sigma        | ASN142  | 3.78            |
|            |                                |                       | Pi–Pi–stacked   | HIS41   | 4.21            |
|            |                                |                       |                 | LEU167  | 5.09            |
|            |                                |                       | Alkyl           | PRO168  | 5.08            |
|            |                                |                       |                 | MET49   | 4.70            |
|            |                                |                       | Pi–alkyl        | MET49   | 4.51            |
|            |                                |                       |                 | MET49   | 5.17            |
|            |                                | Other                 | Pi–sulfur       | CYS44   | 5.45            |
|            |                                |                       |                 | MET165  | 4.38            |
| <b>49p</b> | –12.98                         | Hydrogen Bond<br>(HB) | Conventional HB | HIS164  | 1.87            |
|            |                                |                       | Carbon HB       | THR26   | 3.73            |
|            |                                |                       | Pi–donor HB     | CYS145  | 3.89            |
|            |                                | Hydrophobic           |                 | CYS145  | 4.06            |
|            |                                |                       | Pi–sigma        | ASN142  | 3.80            |
|            |                                |                       | Pi–Pi–stacked   | HIS41   | 4.42            |
|            |                                |                       |                 | HIS41   | 5.06            |
|            |                                |                       | Alkyl           | LEU167  | 4.98            |
|            |                                |                       |                 | MET49   | 5.08            |
|            |                                |                       |                 | PRO168  | 5.31            |
|            |                                |                       | Pi–alkyl        | MET49   | 4.37            |
|            |                                |                       |                 | MET49   | 5.08            |
|            |                                | Other                 | Pi–sulfur       | CYS44   | 5.38            |
|            |                                |                       |                 | MET165  | 4.27            |
|            |                                |                       |                 |         |                 |
|            |                                |                       |                 | ARG188  | 2.94            |
| <b>49x</b> | –12.85                         | Hydrogen Bond<br>(HB) | Conventional HB | HIS164  | 1.90            |
|            |                                |                       |                 | CYS44   | 2.41            |

|             |               |        |      |
|-------------|---------------|--------|------|
|             |               | THR26  | 2.37 |
|             | Carbon HB     | THR26  | 3.63 |
|             | Pi-donor HB   | CYS145 | 3.63 |
| Hydrophobic | Pi-sigma      | ASN142 | 3.80 |
|             | Pi-Pi-stacked | HIS41  | 4.12 |
|             |               | HIS41  | 5.23 |
|             | Alkyl         | LEU167 | 5.18 |
|             |               | PRO168 | 5.16 |
|             | Pi-alkyl      | MET49  | 4.68 |
|             |               | MET49  | 5.16 |
|             |               | CYS44  | 5.32 |
|             |               | CYS145 | 4.25 |
|             |               | CYS44  | 5.31 |
| Other       | Pi-sulfur     | MET165 | 4.41 |

**Table S4:** Details of ligand–protein interactions of designed compounds within the DIS of Mpro

| Compound   | Binding affinity<br>(Kcal/mol) | Category              | Type            | Residue | Distance<br>(Å) |
|------------|--------------------------------|-----------------------|-----------------|---------|-----------------|
| <b>49</b>  | −8.65                          | Hydrogen Bond<br>(HB) | Conventional HB | VAL125  | 2.21            |
|            |                                |                       | Carbon HB       | ARG4    | 2.84            |
|            |                                | Hydrophobic           | Pi–Pi T-shaped  | PHE291  | 5.33            |
|            |                                |                       |                 | ARG4    | 3.50            |
|            |                                |                       | Alkyl           | MET6    | 4.79            |
|            |                                |                       |                 | LYS5    | 3.86            |
|            |                                |                       | Pi–alkyl        | LYS5    | 4.25            |
|            |                                |                       |                 | LYS5    | 5.29            |
|            |                                |                       |                 | ARG4    | 4.01            |
|            |                                |                       |                 | LYS5    | 3.27            |
|            |                                | Electrostatic         | Pi–cation       | LYS5    | 3.27            |
|            |                                | Other                 | Pi–sulfur       | MET6    | 5.79            |
| <b>49n</b> | −9.18                          | Hydrogen Bond<br>(HB) | Conventional HB | VAL125  | 2.33            |
|            |                                |                       |                 | LYS5    | 2.29            |
|            |                                | Hydrophobic           | Carbon HB       | ARG4    | 2.80            |
|            |                                |                       | Pi–Pi T-shaped  | PHE291  | 5.51            |
|            |                                |                       |                 | ARG4    | 3.51            |
|            |                                |                       | Alkyl           | MET6    | 4.80            |
|            |                                |                       |                 | LYS128  | 4.82            |
|            |                                |                       | Pi–alkyl        | ARG4    | 4.01            |
|            |                                |                       |                 | LYS5    | 3.86            |
|            |                                |                       |                 | LYS5    | 4.30            |
|            |                                |                       |                 | LYS5    | 5.43            |
|            |                                |                       |                 | TYR126  | 4.77            |
|            |                                | Electrostatic         | Pi–cation       | LYS5    | 3.29            |
|            |                                | Other                 | Pi–sulfur       | MET6    | 5.84            |
| <b>49p</b> | −9.95                          | Hydrogen Bond<br>(HB) | Conventional HB | VAL125  | 2.24            |
|            |                                |                       | Carbon HB       | ARG4    | 2.82            |
|            |                                | Hydrophobic           | Alkyl           | ARG4    | 3.50            |
|            |                                |                       |                 | MET6    | 4.72            |
|            |                                |                       |                 | CYS128  | 5.33            |
|            |                                |                       |                 | ARG4    | 4.02            |
|            |                                |                       | Pi–alkyl        | LYS5    | 3.82            |
|            |                                |                       |                 | LYS5    | 4.47            |
|            |                                |                       |                 | LYS5    | 5.37            |
|            |                                |                       |                 | TYR126  | 4.67            |
|            |                                | Electrostatic         | Pi–cation       | LYS5    | 3.46            |
|            |                                | Other                 | Pi–sulfur       | MET6    | 5.75            |
| <b>49x</b> | −9.06                          | Hydrogen Bond<br>(HB) | Conventional HB | LYS5    | 1.86            |
|            |                                |                       |                 | LYS5    | 1.86            |
|            |                                |                       |                 | LYS5    | 2.16            |
|            |                                |                       |                 | GLN127  | 2.13            |
|            |                                | Hydrophobic           | Carbon HB       | ARG4    | 2.74            |
|            |                                |                       |                 | GLU290  | 3.20            |
|            |                                |                       | Pi–PI stacked   | TYR126  | 3.73            |
|            |                                |                       |                 | VAL125  | 4.50            |
|            |                                |                       | Alkyl           | VAL125  | 4.70            |
|            |                                |                       |                 | ALA7    | 4.08            |



|               |  |              |        |      |
|---------------|--|--------------|--------|------|
|               |  | Pi-alkyl     | ARG4   | 4.89 |
|               |  |              | LYS5   | 5.27 |
|               |  |              | LYS5   | 4.01 |
|               |  |              | LYS5   | 5.06 |
|               |  |              | GLU290 | 3.89 |
| Electrostatic |  | Pi-anion     |        |      |
| Other         |  | Pi-lone pair | LYS5   | 2.91 |

**Table S5:** Chemical structure of the 55 dihydrophenanthrene derivatives and their corresponding IC<sub>50</sub>

| 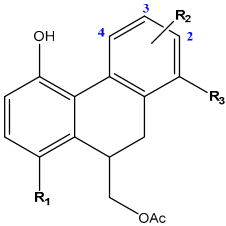 |                               |                    |                                                                                      |                       |
|-----------------------------------------------------------------------------------|-------------------------------|--------------------|--------------------------------------------------------------------------------------|-----------------------|
| ID                                                                                | R <sub>1</sub>                | R <sub>2</sub>     | R <sub>3</sub>                                                                       | IC <sub>50</sub> (μM) |
| 1                                                                                 | CH <sub>3</sub>               | H                  |                                                                                      | 61.15                 |
| 2                                                                                 | C <sub>2</sub> H <sub>5</sub> | H                  |                                                                                      | 33.06                 |
| 3                                                                                 | Isopropyl                     | H                  |                                                                                      | 29.46                 |
| 4                                                                                 | Cyclohexyl                    | H                  |                                                                                      | 9.06                  |
| 5                                                                                 | 4-Br phenyl                   | H                  |    | 6.44                  |
| 6                                                                                 | 4-CN phenyl                   | H                  |                                                                                      | 19.32                 |
| 7                                                                                 | Benzyl                        | H                  |                                                                                      | 11.39                 |
| 8                                                                                 | CH <sub>3</sub>               | 4-CH <sub>3</sub>  |                                                                                      | >100                  |
| 9                                                                                 | CH <sub>3</sub>               | 4-OCH <sub>3</sub> |                                                                                      | >100                  |
| 10                                                                                | CH <sub>3</sub>               | 4-F                |                                                                                      | >100                  |
| 11                                                                                | CH <sub>3</sub>               | 4-Cl               |                                                                                      | 85.58                 |
| 12                                                                                | CH <sub>3</sub>               | 4-Br               |                                                                                      | >100                  |
| 13                                                                                | CH <sub>3</sub>               | 3-CH <sub>3</sub>  |                                                                                      | 57.67                 |
| 14                                                                                | CH <sub>3</sub>               | 2-CH <sub>3</sub>  |                                                                                      | 53.81                 |
| 15                                                                                | CH <sub>3</sub>               | H                  |  | 58.91                 |
| 16                                                                                | CH <sub>3</sub>               | H                  |  | 68.16                 |
| 17                                                                                | CH <sub>3</sub>               | H                  |  | 5.65                  |
| 18                                                                                | CH <sub>3</sub>               | H                  |  | 66.80                 |
| 19                                                                                | CH <sub>3</sub>               | H                  |  | 35.77                 |
| 20                                                                                | CH <sub>3</sub>               | H                  |  | 18.50                 |
| 21                                                                                | CH <sub>3</sub>               | H                  |  | 14.17                 |
| 22                                                                                | CH <sub>3</sub>               | H                  |  | 11.97                 |
| 23                                                                                | CH <sub>3</sub>               | H                  |  | 13.82                 |
| 24                                                                                | CH <sub>3</sub>               | H                  |  | >100                  |

|    |                 |   |                                                                                    |      |
|----|-----------------|---|------------------------------------------------------------------------------------|------|
| 25 | CH <sub>3</sub> | H | 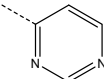 | >100 |
| 26 | CH <sub>3</sub> | H |  | >100 |
| 27 | CH <sub>3</sub> | H |  | >100 |
| 28 | CH <sub>3</sub> | H |  | >100 |

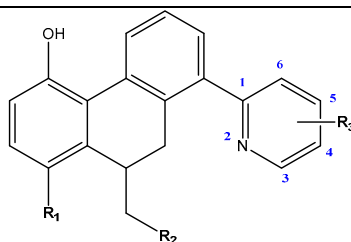

| ID | R <sub>1</sub> | R <sub>2</sub> | R <sub>3</sub>                                                                       | IC <sub>50</sub> (μM) |
|----|----------------|----------------|--------------------------------------------------------------------------------------|-----------------------|
| 29 | Cyclohexyl     | OAc            | 5-Ph                                                                                 | 8.54                  |
| 30 | 4-Br Phenyl    | OAc            | 5-Ph                                                                                 | 2.46                  |
| 31 | 4-Br Phenyl    | OAc            | 5-CH <sub>3</sub>                                                                    | 9.82                  |
| 32 | 4-Br Phenyl    | OAc            | 5-Cl                                                                                 | 4.79                  |
| 33 | 4-Br Phenyl    | OAc            | 5-CN                                                                                 | 10.26                 |
| 34 | 4-Br Phenyl    | OAc            | 5-CHO                                                                                | 3.32                  |
| 35 | 4-Br Phenyl    | OAc            | 5-NCH <sub>3</sub> CH <sub>3</sub>                                                   | 10.00                 |
| 36 | 4-Br Phenyl    | OAc            |  | 11.23                 |
| 37 | 4-Br Phenyl    | OAc            |  | 7.39                  |
| 38 | 4-Br Phenyl    | OAc            | 4-CH <sub>3</sub>                                                                    | 5.25                  |
| 39 | 4-Br Phenyl    | OAc            | 4-F                                                                                  | 4.29                  |
| 40 | 4-Br Phenyl    | OAc            | 4-Cl                                                                                 | 2.72                  |
| 41 | 4-Br Phenyl    | OAc            | 4-Br                                                                                 | 6.73                  |
| 42 | 4-Br Phenyl    | OAc            | 4-CN                                                                                 | 2.78                  |
| 43 | 4-Br Phenyl    | OAc            | 4-CHO                                                                                | 8.89                  |
| 44 | 4-Br Phenyl    | OAc            | 4-methylsulfonyl                                                                     | 6.65                  |
| 45 | 4-Br Phenyl    | OAc            | 4-acetyl                                                                             | 5.83                  |
| 46 | 4-Br Phenyl    | OAc            | 4-NCH <sub>3</sub> CH <sub>3</sub>                                                   | 3.66                  |
| 47 | 4-Br Phenyl    | OAc            | 4-Ph                                                                                 | 8.28                  |
| 48 | 4-Br Phenyl    | OAc            | 4-N-Benzyl                                                                           | 3.31                  |
| 49 | 4-Br Phenyl    | OH             | 5-Ph                                                                                 | 1.55                  |
| 50 | 4-Br Phenyl    | OH             | 5-CHO                                                                                | 1.81                  |
| 51 | 4-Br Phenyl    | OH             | 4-CH <sub>3</sub>                                                                    | 10.23                 |
| 52 | 4-Br Phenyl    | OH             | 4-F                                                                                  | 5.39                  |
| 53 | 4-Br Phenyl    | OH             | 4-Cl                                                                                 | 4.71                  |
| 54 | 4-Br Phenyl    | OH             | 4-CN                                                                                 | 10.68                 |

|    |             |    |                                    |      |
|----|-------------|----|------------------------------------|------|
| 55 | 4-Br Phenyl | OH | 4-NCH <sub>3</sub> CH <sub>3</sub> | 5.50 |
|----|-------------|----|------------------------------------|------|

---

**Table S6:** SMILES notation of the 55 dihydrophenanthrene derivatives and their pIC<sub>50</sub>

| ID | SMILES                                                                            | pIC <sub>50</sub> |
|----|-----------------------------------------------------------------------------------|-------------------|
| 1  | <chem>CC(=O)OCC1Cc2c(cccc2c2c(O)ccc(C)c21)c1cccn1</chem>                          | 4.214             |
| 2  | <chem>CC(=O)OCC1Cc2c(cccc2c2c(O)ccc(CC)c21)c1cccn1</chem>                         | 4.481             |
| 3  | <chem>CC(C)c1ccc(O)c2c3cccc(c3CC(COC(C)=O)c12)c1cccn1</chem>                      | 4.531             |
| 4  | <chem>CC(=O)OCC1Cc2c(cccc2c2c(O)ccc(C3CCCCC3)c21)c1cccn1</chem>                   | 5.043             |
| 5  | <chem>BrC1ccc(cc1)c1ccc(O)c2c3cccc(c3CC(COC(C)=O)c12)c1cccn1</chem>               | 5.190             |
| 6  | <chem>N#Cc1ccc(cc1)c1ccc(O)c2c3cccc(c3CC(COC(C)=O)c12)c1cccn1</chem>              | 4.714             |
| 7  | <chem>CC(=O)OCC1Cc2c(cccc2c2c(O)ccc(c3cccc3)c21)c1cccn1</chem>                    | 4.945             |
| 8  | <chem>CC(=O)OCC1Cc2c(ccc(C)c2c2c(O)ccc(C)c21)c1cccn1</chem>                       | 4.000             |
| 9  | <chem>CC(=O)OCC1Cc2c(ccc(OC)c2c2c(O)ccc(C)c21)c1cccn1</chem>                      | 4.000             |
| 10 | <chem>CC(=O)OCC1Cc2c(ccc(F)c2c2c(O)ccc(C)c21)c1cccn1</chem>                       | 4.000             |
| 11 | <chem>CC(=O)OCC1Cc2c(ccc(Cl)c2c2c(O)ccc(C)c21)c1cccn1</chem>                      | 4.068             |
| 12 | <chem>CC(=O)OCC1Cc2c(ccc(Br)c2c2c(O)ccc(C)c21)c1cccn1</chem>                      | 4.000             |
| 13 | <chem>CC(=O)OCC1Cc2c(cc(C)cc2c2c(O)ccc(C)c21)c1cccn1</chem>                       | 4.239             |
| 14 | <chem>CC(=O)OCC1Cc2c(c3cccn3)c(C)ccc2c2c(O)ccc(C)c21</chem>                       | 4.269             |
| 15 | <chem>CC(=O)OCC1Cc2c(cccc2c2c(O)ccc(C)c21)c1ncccc1C</chem>                        | 4.230             |
| 16 | <chem>CC(=O)OCC1Cc2c(cccc2c2c(O)ccc(C)c21)c1cc(C)ccn1</chem>                      | 4.166             |
| 17 | <chem>CC(=O)OCC1Cc2c(cccc2c2c(O)ccc(C)c21)c1cc(ccn1)c1cccc1</chem>                | 5.248             |
| 18 | <chem>CC(=O)OCC1Cc2c(cccc2c2c(O)ccc(C)c21)c1ccc(F)cn1</chem>                      | 4.175             |
| 19 | <chem>CC(=O)OCC1Cc2c(cccc2c2c(O)ccc(C)c21)c1ccc(Cl)cn1</chem>                     | 4.446             |
| 20 | <chem>CC(=O)OCC1Cc2c(cccc2c2c(O)ccc(C)c21)c1ccc(Br)cn1</chem>                     | 4.733             |
| 21 | <chem>CC(=O)OCC1Cc2c(cccc2c2nccc3cccc32)c2c(O)ccc(C)c21</chem>                    | 4.849             |
| 22 | <chem>CC(=O)OCC1Cc2c(cccc2c2cc3cccc3cn2)c2c(O)ccc(C)c21</chem>                    | 4.922             |
| 23 | <chem>CC(=O)OCC1Cc2c(cccc2c2ccc3cccc3n2)c2c(O)ccc(C)c21</chem>                    | 4.859             |
| 24 | <chem>CC(=O)OCC1Cc2c(cccc2c2c(O)ccc(C)c21)c1ncccn1</chem>                         | 4.000             |
| 25 | <chem>CC(=O)OCC1Cc2c(cccc2c2c(O)ccc(C)c21)c1ccncc1</chem>                         | 4.000             |
| 26 | <chem>CC(=O)OCC1Cc2c(cccc2c2c(O)ccc(C)c12)n1cccn1</chem>                          | 4.000             |
| 27 | <chem>CC(=O)OCC1Cc2c(cccc2c2nccn3c2ncc3CC2CC2)c2c(O)ccc(C)c21</chem>              | 4.000             |
| 28 | <chem>CC(=O)OCC1Cc2c(cccc2c2nccn3c2ncc3CC=C)c2c(O)ccc(C)c21</chem>                | 4.000             |
| 29 | <chem>CC(=O)OCC1Cc2c(cccc2c2c(O)ccc(C3CCCCC3)c21)c1cc(ccn1)c1cccc1</chem>         | 5.069             |
| 30 | <chem>BrC1ccc(cc1)c1ccc(O)c2c3cccc(c3CC(COC(C)=O)c12)c1cc(ccn1)c1cccc1</chem>     | 5.609             |
| 31 | <chem>BrC1ccc(cc1)c1ccc(O)c2c3cccc(c3CC(COC(C)=O)c12)c1cc(C)ccn1</chem>           | 5.008             |
| 32 | <chem>BrC1ccc(cc1)c1ccc(O)c2c3cccc(c3CC(COC(C)=O)c12)c1cc(Cl)ccn1</chem>          | 5.320             |
| 33 | <chem>BrC1ccc(cc1)c1ccc(O)c2c3cccc(c3CC(COC(C)=O)c12)c1cc(ccn1)C#N</chem>         | 4.989             |
| 34 | <chem>BrC1ccc(cc1)c1ccc(O)c2c3cccc(c3CC(COC(C)=O)c12)c1cc(ccn1)C=O</chem>         | 5.479             |
| 35 | <chem>BrC1ccc(cc1)c1ccc(O)c2c3cccc(c3CC(COC(C)=O)c12)c1cc(ccn1)N(C)C</chem>       | 5.000             |
| 36 | <chem>BrC1ccc(cc1)c1ccc(O)c2c3cccc(c4nccc(c4)N4CCCC4)c3CC(COC(C)=O)c12</chem>     | 4.950             |
| 37 | <chem>BrC1ccc(cc1)c1ccc(O)c2c3cccc(c4cc(ccn4)N4CCOCC4)c3CC(COC(C)=O)c12</chem>    | 5.131             |
| 38 | <chem>BrC1ccc(cc1)c1ccc(O)c2c3cccc(c3CC(COC(C)=O)c12)c1ccc(C)cn1</chem>           | 5.280             |
| 39 | <chem>BrC1ccc(cc1)c1ccc(O)c2c3cccc(c3CC(COC(C)=O)c12)c1ccc(F)cn1</chem>           | 5.368             |
| 40 | <chem>BrC1ccc(cc1)c1ccc(O)c2c3cccc(c3CC(COC(C)=O)c12)c1ccc(Cl)cn1</chem>          | 5.565             |
| 41 | <chem>BrC1ccc(cc1)c1ccc(O)c2c3cccc(c3CC(COC(C)=O)c12)c1ccc(Br)cn1</chem>          | 5.172             |
| 42 | <chem>BrC1ccc(cc1)c1ccc(O)c2c3cccc(c3CC(COC(C)=O)c12)c1ccc(ccn1)C#N</chem>        | 5.556             |
| 43 | <chem>BrC1ccc(cc1)c1ccc(O)c2c3cccc(c3CC(COC(C)=O)c12)c1ccc(ccn1)C=O</chem>        | 5.051             |
| 44 | <chem>BrC1ccc(cc1)c1ccc(O)c2c3cccc(c3CC(COC(C)=O)c12)c1ccc(ccn1)S(C)(=O)=O</chem> | 5.177             |
| 45 | <chem>BrC1ccc(cc1)c1ccc(O)c2c3cccc(c3CC(COC(C)=O)c12)c1ccc(ccn1)C(C)=O</chem>     | 5.234             |
| 46 | <chem>BrC1ccc(cc1)c1ccc(O)c2c3cccc(c3CC(COC(C)=O)c12)c1ccc(ccn1)N(C)C</chem>      | 5.437             |
| 47 | <chem>BrC1ccc(cc1)c1ccc(O)c2c3cccc(c3CC(COC(C)=O)c12)c1ccc(ccn1)c1cccc1</chem>    | 5.082             |
| 48 | <chem>BrC1ccc(cc1)c1ccc(O)c2c3cccc(c3CC(COC(C)=O)c12)c1ccc(ccn1)NCc1cccc1</chem>  | 5.480             |

|    |                                                                         |       |
|----|-------------------------------------------------------------------------|-------|
| 49 | <chem>Brc1ccc(cc1)c1ccc(O)c2c3cccc(c3CC(CO)c12)c1cc(cen1)c1cccc1</chem> | 5.810 |
| 50 | <chem>Brc1ccc(cc1)c1ccc(O)c2c3cccc(c3CC(CO)c12)c1cc(cen1)C=O</chem>     | 5.742 |
| 51 | <chem>Brc1ccc(cc1)c1ccc(O)c2c1c(CO)cc1c(cccc21)c1ccc(C)cn1</chem>       | 4.990 |
| 52 | <chem>Brc1ccc(cc1)c1ccc(O)c2c3cccc(c3CC(CO)c12)c1ccc(F)cn1</chem>       | 5.268 |
| 53 | <chem>Brc1ccc(cc1)c1ccc(O)c2c3cccc(c3CC(CO)c12)c1ccc(Cl)cn1</chem>      | 5.327 |
| 54 | <chem>Brc1ccc(cc1)c1ccc(O)c2c3cccc(c3CC(CO)c12)c1ccc(en1)C#N</chem>     | 4.971 |
| 55 | <chem>Brc1ccc(cc1)c1ccc(O)c2c3cccc(c3CC(CO)c12)c1ccc(en1)N(C)C</chem>   | 5.260 |
